# Supplementary material for: Progressive Loss of Corneal and Retinal Nerve Fibers in Patients With Multiple Sclerosis: A 2-Year Follow-up Study
Source: PubMed Central journal article supplement — Transl Vis Sci Technol. 2020 Dec 21;9(13):37. doi: 10.1167/tvst.9.13.37 (PMC7757607; doi:10.1167/tvst.9.13.37), 2020-12-21
Supplement: tvst-9-13-37_s001.pdf [file tvst-9-13-37_s001.pdf]

**Supplementary Table S1.** The change in peripapillary RNFL thickness in patients with and without previous optic neuritis.

|                                                               | Baseline        | Follow-up       | <i>P</i> value* |
|---------------------------------------------------------------|-----------------|-----------------|-----------------|
| RNFL in patients with previous ON (n=18) ( $\mu\text{m}$ )    | 80.4 $\pm$ 15.3 | 79.1 $\pm$ 15.8 | <b>0.01</b>     |
| RNFL in patients without previous ON (n=13) ( $\mu\text{m}$ ) | 89.1 $\pm$ 9.9  | 88.1 $\pm$ 9.6  | 0.13            |

Abbreviations: ON, optic neuritis; RNFL, retinal nerve fiber layer.

Data are expressed as mean  $\pm$  SD.

\* Paired samples t-test

**Supplementary Table S2.** Study parameters at baseline and follow-up in patients receiving fingolimod compared to interferon-beta.

|                                          |           | Patients receiving fingolimod (n=13) | Patients receiving interferon-beta (n=10) | P value       |
|------------------------------------------|-----------|--------------------------------------|-------------------------------------------|---------------|
| CNFD (no./mm <sup>2</sup> )              | Baseline  | 29.3 ± 4.8                           | 24.9 ± 9.9                                | 0.18*         |
|                                          | Follow-up | 26.1 ± 7.2                           | 24.3 ± 5.9                                | 0.55*         |
|                                          | Change    | -1.6 (-7.3 – 1.0)                    | 0.4 (-8.3 – 5.2)                          | 0.41†         |
| CNBD (no./mm <sup>2</sup> )              | Baseline  | 41.9 ± 21.7                          | 31.6 ± 16.6                               | 0.23*         |
|                                          | Follow-up | 33.2 ± 15.0                          | 31.0 ± 16.6                               | 0.74*         |
|                                          | Change    | -8.9 (-22.4 – 7.8)                   | -5.4 (-8.5 – 5.2)                         | 0.52†         |
| CNFL (mm/mm <sup>2</sup> )               | Baseline  | 16.6 ± 3.1                           | 15.4 ± 3.5                                | 0.41*         |
|                                          | Follow-up | 15.2 ± 2.6                           | 14.4 ± 3.0                                | 0.49*         |
|                                          | Change    | -1.3 (-3.0 – -0.6)                   | -1.0 (-3.1 – -0.1)                        | 0.61†         |
| CTBD (no./mm <sup>2</sup> )              | Baseline  | 58.6 ± 28.9                          | 49.9 ± 19.5                               | 0.43*         |
|                                          | Follow-up | 49.6 ± 19.2                          | 46.1 ± 20.8                               | 0.68*         |
|                                          | Change    | -2.1 (-20.8 – 5.7)                   | -11.2 (-15.3 – 12.0)                      | >0.99†        |
| CNFA (µm <sup>2</sup> /mm <sup>2</sup> ) | Baseline  | 7330.7 ± 1328.7                      | 7040.0 ± 1352.5                           | 0.61*         |
|                                          | Follow-up | 6361.5 ± 2121.9                      | 5560.0 ± 1572.1                           | 0.33*         |
|                                          | Change    | -600.0 (-2050.0 – 250.0)             | -1800.0 (-2625.0 – -575.0)                | 0.26†         |
| CNFW (µm)                                | Baseline  | 22.5 ± 1.3                           | 21.9 ± 1.4                                | 0.25*         |
|                                          | Follow-up | 21.3 ± 1.2                           | 20.8 ± 0.8                                | 0.24*         |
|                                          | Change    | -0.8 (-1.4 – -0.3)                   | -0.9 (-2.5 – 0.7)                         | 0.83†         |
| DC density (no./mm <sup>2</sup> )        | Baseline  | 29.0 (3.5 – 61.7)                    | 15.9 (11.3 – 36.2)                        | 0.74†         |
|                                          | Follow-up | 75.3 (13.2 – 111.6)                  | 21.7 (4.7 – 55.4)                         | 0.23†         |
|                                          | Change    | 44.3 (0 – 81.2)                      | -4.2 (-20.3 – 11.3)                       | <b>0.04</b> † |
| RNFL (µm)                                | Baseline  | 82.8 ± 10.6                          | 90.3 ± 12.7                               | 0.14*         |
|                                          | Follow-up | 81.3 ± 11.6                          | 89.7 ± 12.4                               | 0.11*         |
|                                          | Change    | -2.0 (-3.0 - 0)                      | 0 (-0.8 – 1.0)                            | 0.23†         |
| EDSS                                     | Baseline  | 3.0 (2.5 – 3.5)                      | 2.5 (2.0 – 3.5)                           | 0.34†         |
|                                          | Follow-up | 3.5 (2.8 – 4.0)                      | 2.5 (2.0 – 3.6)                           | 0.17†         |
|                                          | Change    | 0.5 (0 – 0.5)                        | 0.3 (0 – 0.5)                             | 0.38†         |
| MSSS                                     | Baseline  | 4.7 ± 1.8                            | 4.4 ± 1.9                                 | 0.68*         |
|                                          | Follow-up | 4.7 ± 1.7                            | 4.0 ± 1.7                                 | 0.34*         |
|                                          | Change    | 0 (-0.6 – 0.2)                       | -0.3 (-0.6 – -0.1)                        | 0.38†         |

Abbreviations: CNFD, corneal nerve fiber density; CNBD, corneal nerve branch density; CNFL, corneal nerve fiber length; CTBD, corneal total branch density; CNFA, corneal nerve fiber area; CNFW, corneal nerve fiber width; DC, dendritic cell; RNFL, retinal nerve fiber layer; EDSS, Expanded Disability Status Scale; MSSS, Multiple Sclerosis Severity Score.

Data are expressed as mean  $\pm$  SD for CNFD, CNBD, CNFL, CTBD, CNFA, CNFW, RNFL and MSSS, and median (interquartile range) for DC density, EDSS and change in the parameters.

\* Independent samples t-test, † Mann Whitney U-test.
